# Supplementary material for: SARS-CoV-2-induced disruption of a vascular bed in a microphysiological system caused by type-I interferon from bronchial organoids
Source: Royal Society of Chemistry journal article supplement (doi:10.1039/d3lc00768e), 2024-01-01
Supplement: d3lc00768e1.pdf [file d3lc00768e1.pdf]

# Supplementary Materials for

## **SARS-CoV-2-induced disruption of a vascular bed in a microphysiological system caused by type-I interferon from bronchial organoids**

Kazuya Fujimoto,<sup>a</sup> Yoshikazu Kameda,<sup>a</sup> Yuta Nagano,<sup>a</sup> Sayaka Deguchi,<sup>b</sup> Takuya Yamamoto,<sup>b,c,d</sup> Rafal P. Krol,<sup>e</sup> Peter Gee,<sup>f</sup> Yasufumi Matsumura,<sup>g</sup> Toru Okamoto,<sup>h</sup> Miki Nagao,<sup>g</sup> Kazuo Takayama,<sup>b\*</sup> and Ryuji Yokokawa<sup>\*†</sup>

- a. Department of Micro Engineering, Kyoto University, Kyoto daigaku-Katsura, Nishikyo-ku, Kyoto 615-8540, Japan  
b. Center for iPS cell Research and Application (CiRA), Kyoto University, Shogoin-Kawahara-cho 53, Sakyo-ku, Kyoto, 606-8507, Japan  
c. Institute for the Advanced Study of Human Biology (WPI-ASHBi), Yoshida-Konoe-cho, Sakyo-ku, Kyoto, 606-8501, Japan  
d. Medical-risk Avoidance based on iPS Cells Team, RIKEN Center for Advanced Intelligence Project (AIP), Shogoin-Kawahara-cho 53, Sakyo-ku, Kyoto, 606-8507, Japan  
e. Research and Development Center, CiRA foundation, Shogoin-Kawahara-cho 53, Sakyo-ku, Kyoto, 606-8397, Japan  
f. MaxCyte, Inc., Gaithersburg, MD 20878, USA  
g. Department of Clinical Laboratory Medicine, Kyoto University Graduate School of Medicine, Shogoin-Kawahara-cho 53, Sakyo-ku, Kyoto, 606-8507, Japan  
h. Department of Microbiology, School of Medicine, Juntendo University, Hongo 2-1-1, Bunkyo-ku, Tokyo, 113-8421, Japan

\* Corresponding author email: kazuo.takayama@cira.kyoto-u.ac.jp (K.T), yokokawa.ryuji.8c@kyoto-u.ac.jp (R. Y)

### **This PDF file includes:**

Supplementary Discussion  
Supplementary Figs. S1 to S7  
Supplementary Tables S1 to S3

## Supplementary Discussion

### Estimation of virus particle distribution.

Here, we assessed the effect of gravity and diffusion driven migration of virus particles. Firstly, the terminal settling velocity ( $v$ ) of a virus particle is calculated using Stokes's law, considering low Reynolds number,

$$v = \frac{2\rho_p - \rho_w}{9\mu} gR^2, \quad (1)$$

where  $\rho_p$ ,  $\rho_w$ ,  $\mu$ ,  $g$ , and  $R$  are density of particle, density of water, viscosity of water, gravitational acceleration, and virus particle radius, respectively. The particle radius were set as 50 nm based on a previous report.<sup>1</sup> Other parameters, as outlined in Table S1 yield a terminal velocity of 2.7 nm/s.

Diffusion constant  $D$  is described by Stokes-Einstein equation,

$$D = \frac{k_B T}{6\pi\mu R}, \quad (2)$$

where  $k_B$  and  $T$  are Boltzmann constant and temperature, respectively. The value of  $D$  was  $4.4 \times 10^{-12}$  m<sup>2</sup>/s. Regarding these values, Peclet number  $Pe$ , which represents the ratio of convection flow against diffusion is calculated

$$Pe = \frac{Lv}{D}, \quad (3)$$

Where  $L$  is the representative length of the system. Here, we applied  $L = 500$   $\mu\text{m}$  which matches to the sum of the VB-culture channel height and the height of hole connecting the VB-culturechannel and the BO-culture well. Calculation gave us  $Pe = 0.31$ , indicating that diffusion is governing virus particle distribution.

Static distribution of virus particle under gravity is derived previously.<sup>2</sup> Using convection parameter  $c$  and diffusion constant  $D$  it is written as,

$$w(z) = \frac{c}{D} e^{-cz/D}. \quad (4)$$

$c/D$  is also expressed as

$$\frac{c}{D} = \left(1 - \frac{\rho_p}{\rho_w}\right) \left(\frac{mg}{k_B T}\right), \quad (4)$$

where  $m$  represents a mass of single particle. When we set  $z = 500$   $\mu\text{m}$ , representing the distance from the bottom of the VB-culture channel to the bottom of the BO-culture well, the density is calculated as 94% of the value with  $z = 0$   $\mu\text{m}$ . This suggests that the effect of gravity on the distribution of the virus particle is limited.

1. Ke, Z. *et al.* Structures and distributions of SARS-CoV-2 spike proteins on intact virions. *Nature* **588**, 498–502 (2020).
2. Chandrasekhar, S. Stochastic Problems in Physics and Astronomy. *Rev. Mod. Phys.* **15**, 1–89 (1943).

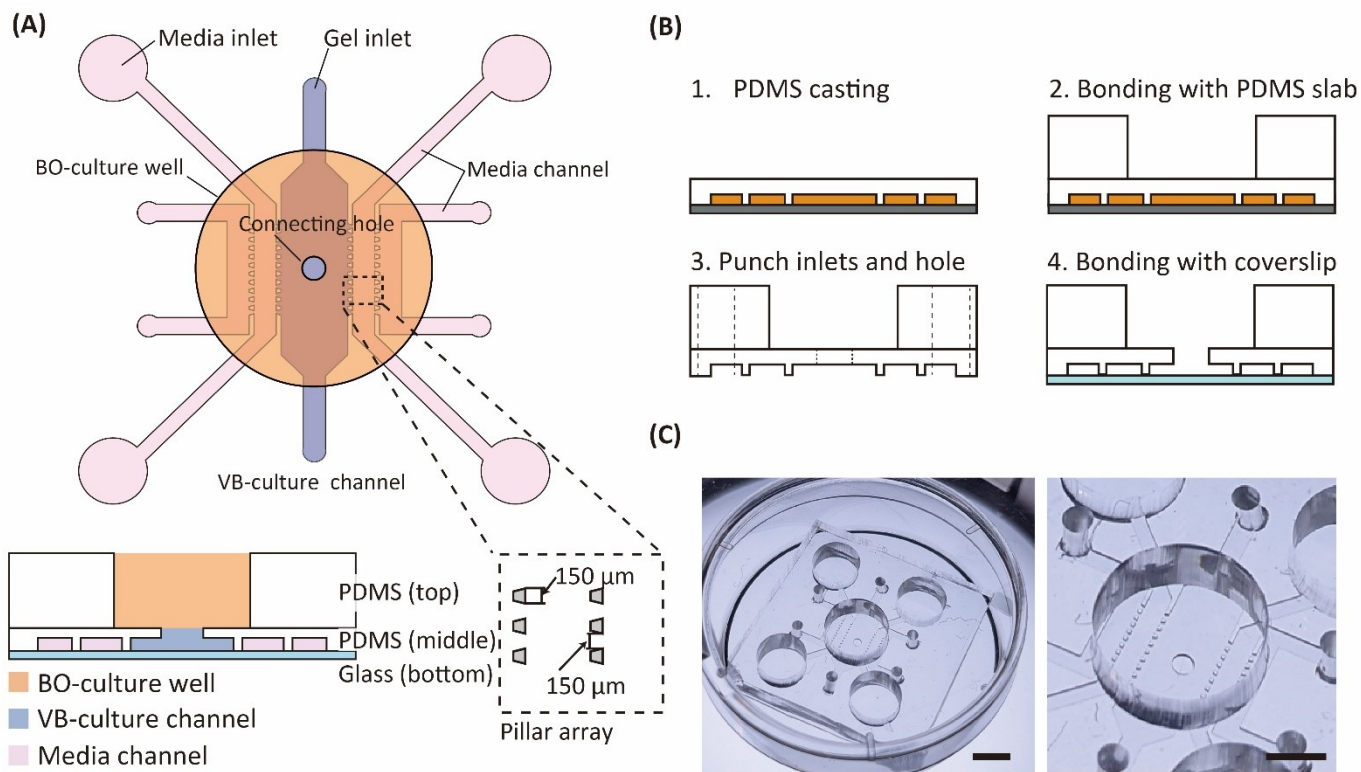

**Fig. S1. Device design and fabrication.** (A) Design and dimensions of the microfluidic device. The VB-culture channel (light blue) is separated from the media channels (pink) by an array of pillars. A connecting hole opens to the VB-culture channel and the BO-culture well (orange) at the center of the channel. (B) Fabrication process. (1) PDMS prepolymer was cast on the mold as the middle PDMS layer. (2) The top PDMS layer was bonded to the cured middle layer. (3) Gel inlets, media reservoirs, and connecting holes were punched after removing the top and middle layers from the mold. (4) Two layers were bonded with a coverslip to form closed channels. (C) The microfluidic device in a 35-mm dish (left) and magnified view (right). Scale bar: 1 mm.

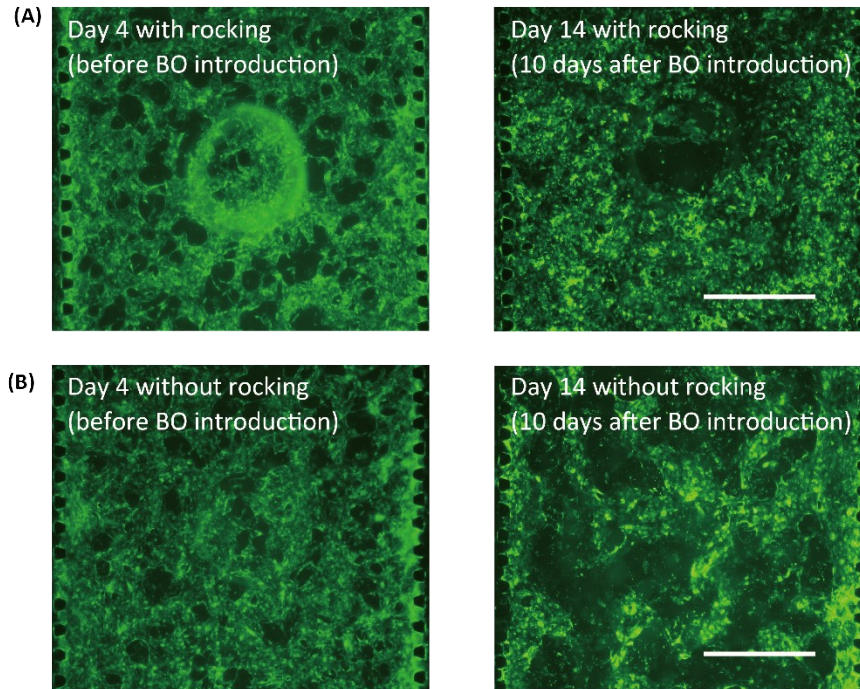

**Fig. S2. VB before and after co-culture with the BOs.** VB image before the BOs were introduced (day 4) and after 10 days of co-culturing with the BOs (day 14), GFP: Green. With rocking 1 cycle / min (A) or without rocking (B). Scale bar: 1 mm.

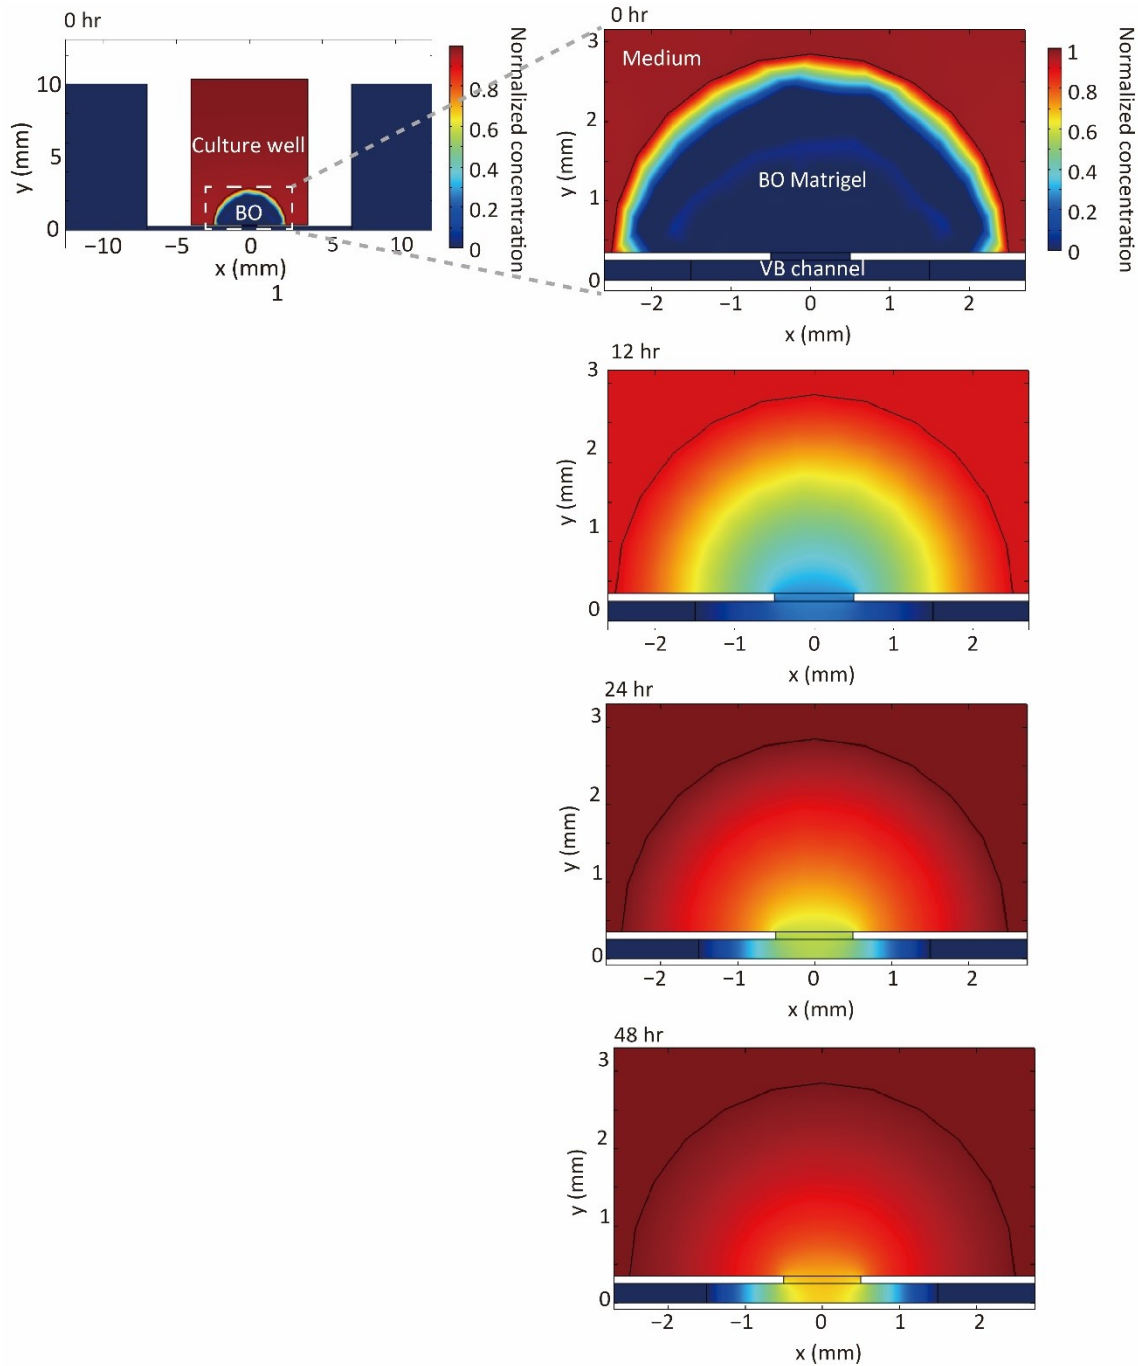

**Fig. S3. Numerical simulation of virus particle diffusion in the ECM.** Numerical simulation results of virus particle diffusion in the ECM. The diffusion of virus particles into Matrigel containing BOs and ECM gel in the VB-culture channel was numerically simulated and visualized for 48 hours.

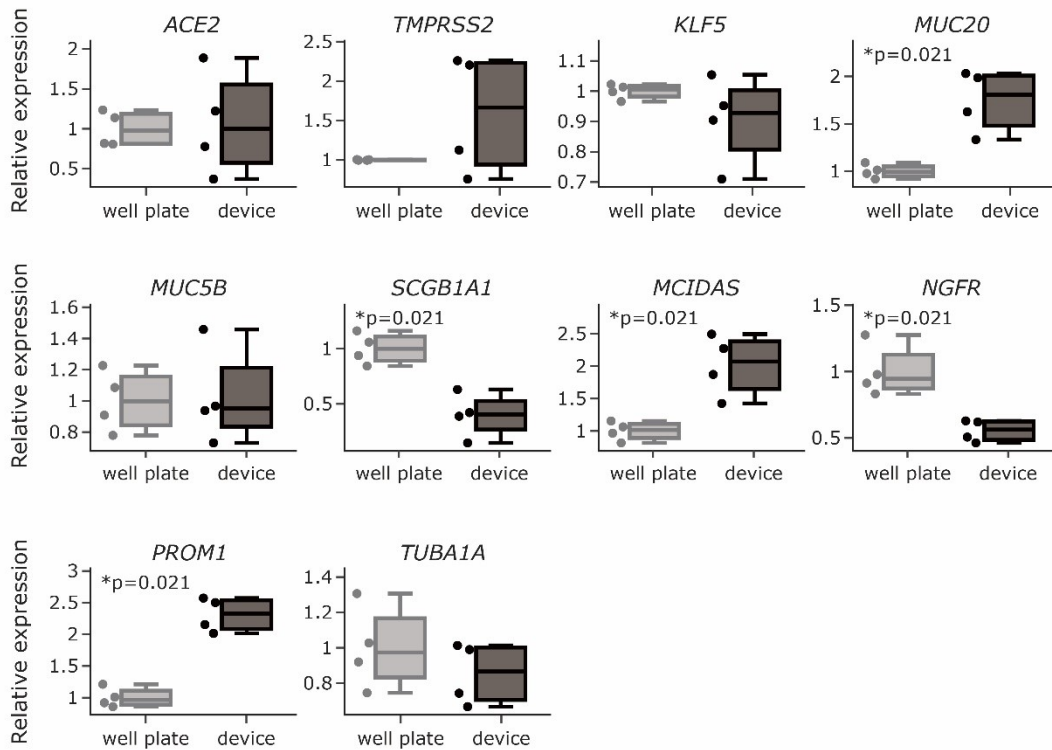

**Fig. S4. Generation of BOs in a device and well plate.** Expression of virus infection-related genes and bronchial markers was measured in BOs in well plates and devices. p-values were calculated using Wilcoxon's rank sum test. N = 5 replications.

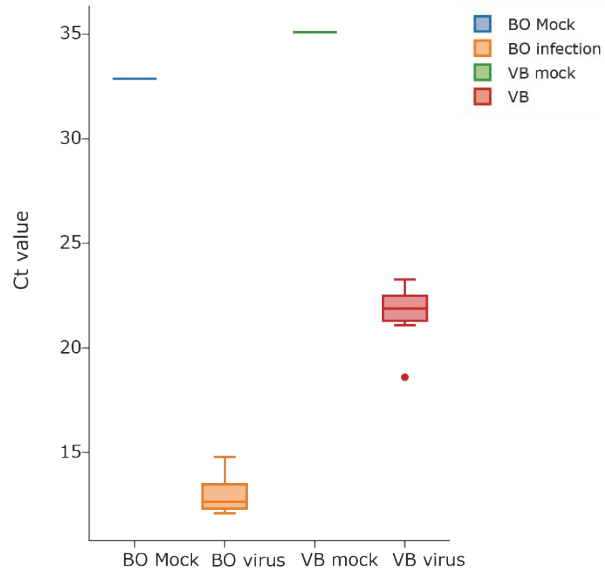

**Fig. S5. Ct values for *SARS-CoV-2 N*.** Distribution of Ct values obtained from qPCR test implemented with VB and BO samples without the virus (mock) and with the virus (infected).

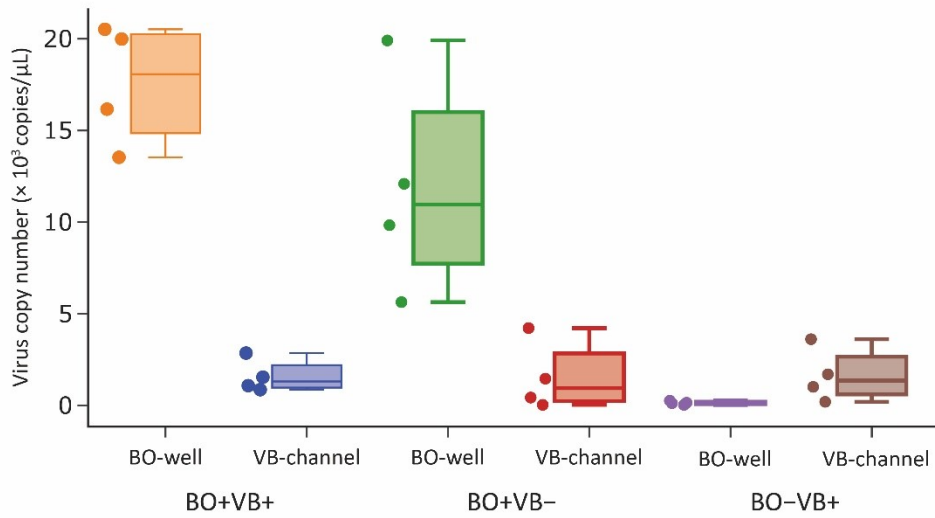

**Fig. S6. Virus copy number in supernatants from different virus applications.** Virus copy numbers in supernatants from the BO-culture well and the VB-culture channel were measured when the virus was applied to the BO-culture well and the VB-culture channel (BO+VB+), only the BO-culture well (BO+VB-), and only the VB-culture channel (BO-VB+).



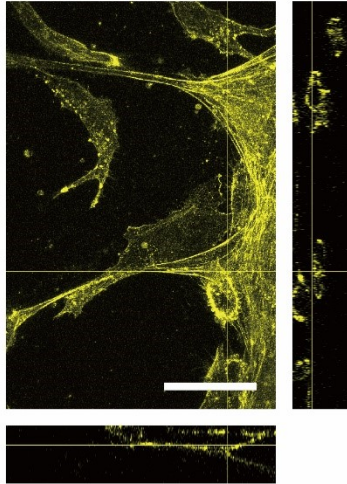

**Fig. S7. Orthogonal view of the VB in the SARS-CoV-2-infected device.** Fluorescent orthogonal images of actin filament (yellow) from three sides (top view and two orthogonal cross-sectional views) were taken from a damaged vascular structure in a SARS-CoV-2-infected device. Scale bar: 100  $\mu\text{m}$ .

**Table S1**

Parameters in virus distribution considerations

| <b>Parameter</b>           | <b>Symbol</b> | <b>Value</b>                                                        |
|----------------------------|---------------|---------------------------------------------------------------------|
| Boltzmann constant         | $k_B$         | $1.38 \times 10^{-23} \text{ m}^2 \text{ kg s}^{-2} \text{ K}^{-1}$ |
| Temperature                | $T$           | 300 K                                                               |
| Viscosity                  | $\mu$         | $1 \times 10^{-3} \text{ Pa s}$                                     |
| Particle radius            | $R$           | $5 \times 10^{-8} \text{ m}$                                        |
| Particle density           | $\rho_p$      | $1.5 \times 10^3 \text{ kg m}^{-3}$                                 |
| Solution density           | $\rho_w$      | $1.0 \times 10^3 \text{ kg m}^{-3}$                                 |
| Gravitational acceleration | $g$           | $9.81 \text{ m s}^{-2}$                                             |
| Representative length      | $L$           | $5 \times 10^{-4} \text{ m}$                                        |

**Table S2**

Antibodies and labeling reagents

| <b>Reagent</b>                              | <b>Item number</b> | <b>Company</b>           |
|---------------------------------------------|--------------------|--------------------------|
| Alexa Fluor 647 Phalloidin                  | A30107             | Thermo Fisher Scientific |
| DAPI                                        | D3571              | Thermo Fisher Scientific |
| Cytokeratin Antibody                        | Ab193895           | Abcam                    |
| Acetylated tubulin Antibody                 | T7451              | Sigma-Aldrich            |
| CD31 Antibody                               | 555444             | Becton                   |
| Alexa fluor 647 labeled E-Cadherin Antibody | EP700Y             | Abcam                    |

**Table S3**

Sequences of primers used for qPCR

| <b>Target gene</b>   | <b>Fwd primer</b>       | <b>Rev primer</b>       |
|----------------------|-------------------------|-------------------------|
| <i>KRT5</i>          | CCAAGGTTGATGCACTGATGG   | TGTCAGAGACATGCGTCTGC    |
| <i>MCIDAS</i>        | ATTCCCACCAAACGGAAGCAG   | CCAGGGTAGGCGACATCATAG   |
| <i>NGFR</i>          | CCTACGGCTACTACCAGGATG   | CACACGGTGTTCTGCTTGT     |
| <i>TP63</i>          | GGACCAGCAGATTCAGAACGG   | AGGACACGTGCGAAACTGTGC   |
| <i>TUBA1A</i>        | TCGATATTGAGCGTCCAACCT   | CAAAGGCACGTTTGGCATAACA  |
| <i>ACE2</i>          | ACAGTCCACACTTGCCCAAAT   | TGAGAGCACTGAAGACCCATT   |
| <i>TMPRSS2</i>       | GTCCTCCACTGTCTACGAGGT   | CAGACGACGGGGTTGGAAG     |
| <i>IFNA1</i>         | GCAGATCACCCAGAAGATCG    | GGCCCTTGTTATTCCTCACC    |
| <i>IFNB1</i>         | CCTTGCTGAAGTGTGGAGGA    | CCAGGCGATAGGCAGAGA      |
| <i>MxA</i>           | CTTATCCGTTAGCCGTGGTG    | CAAGGTGGAGCGATTCTGAG    |
| <i>ISG56</i>         | CCTTGCTGAAGTGTGGAGGA    | CCAGGCGATAGGCAGAGA      |
| <i>ISG15</i>         | GCAGATCACCCAGAAGATCG    | GGCCCTTGTTATTCCTCACC    |
| <i>ICAM1</i>         | ATGCCCAGACATCTGTGTCC    | GGGGTCTCTATGCCCAACAA    |
| <i>VCAM1</i>         | GGGAAGATGGTCGTGATCCTT   | TCTGGGGTGGTCTCGATTTTA   |
| <i>VE-CAD (CDH5)</i> | TTGGAACCAGATGCACATTGAT  | TCTTGCGACTCACGCTTGAC    |
| <i>ZO-1 (TJP1)</i>   | CTTACCACACTGTGCGTCCAT   | AGGAGTCGGATGATTTTAGAGCA |
| <i>IL-6</i>          | CCTGAACCTTCCAAAGATGGC   | TTCACCAGGCAAGTCTCCTCA   |
| <i>SARS-CoV-2</i>    | AGCCTCTTCTCGTTCCTCATCAC | CCGCCATTGCCAGCCATTC     |
